# Supplementary material for: eDNA Increases the Detectability of Ranavirus Infection in an Alpine Amphibian Population
Source: PubMed Central journal article supplement (PMC6631829; doi:10.3390/v11060526), 2019-06-06
Supplement: viruses-11-00526-s001.pdf [file viruses-11-00526-s001.pdf]

**Supplementary material Table S1.** Detection of Ranavirus in common frog (adult and tadpole) at the Balaour pond (Southeaster Alps) in 2016

|          | Tadpole alive         |            | Tadpole dead         |            | Adult alive           |            | Adult dead           |            |
|----------|-----------------------|------------|----------------------|------------|-----------------------|------------|----------------------|------------|
|          | GE                    | prevalence | GE                   | prevalence | GE                    | prevalence | GE                   | prevalence |
| 06/10-11 | 3.97                  | 1/5        |                      |            | 0                     | 0/5        | 2.83*10 <sup>1</sup> | 1/1        |
|          | 0                     |            |                      |            | 0                     |            |                      |            |
|          | 0                     |            |                      |            | 0                     |            |                      |            |
|          | 0                     |            |                      |            | 0                     |            |                      |            |
|          | 0                     |            |                      |            | 0                     |            |                      |            |
| 06/23-24 | 1.67*10 <sup>1</sup>  | 4/5        |                      |            | 1.13                  | 3/5        |                      |            |
|          | 1.33*10 <sup>2</sup>  |            |                      |            | 5.98*10 <sup>-1</sup> |            |                      |            |
|          | 8.64                  |            |                      |            | 3.89                  |            |                      |            |
|          | 3.47*10 <sup>1</sup>  |            |                      |            | 0                     |            |                      |            |
|          | 0                     |            |                      |            | 0                     |            |                      |            |
| 07/08    | 2.3                   | 5/5        |                      |            | 1.21*10 <sup>3</sup>  | 4/5        |                      |            |
|          | 8.4 *10 <sup>-1</sup> |            |                      |            | 3.91*10 <sup>1</sup>  |            |                      |            |
|          | 1.23*10 <sup>1</sup>  |            |                      |            | 4.37*10 <sup>2</sup>  |            |                      |            |
|          | 1.76                  |            |                      |            | 2.24*10 <sup>1</sup>  |            |                      |            |
|          | 1.60*10 <sup>1</sup>  |            |                      |            |                       |            |                      |            |
| 07/27    | 8.4 *10 <sup>-1</sup> | 4/5        | 8.9*10 <sup>7</sup>  | 10/10      |                       |            |                      |            |
|          | 1.23*10 <sup>1</sup>  |            | 4.48*10 <sup>6</sup> |            |                       |            |                      |            |
|          | 1.76                  |            | 1.58*10 <sup>7</sup> |            |                       |            |                      |            |
|          | 1.60*10 <sup>1</sup>  |            | 5.38*10 <sup>6</sup> |            |                       |            |                      |            |
|          | 0                     |            | 1.94*10 <sup>7</sup> |            |                       |            |                      |            |
|          |                       |            | 3.85*10 <sup>6</sup> |            |                       |            |                      |            |
|          |                       |            | 1.47*10 <sup>6</sup> |            |                       |            |                      |            |
|          |                       |            | 6.43*10 <sup>4</sup> |            |                       |            |                      |            |

|          |                      |     |                      |  |   |     |  |
|----------|----------------------|-----|----------------------|--|---|-----|--|
|          |                      |     | 3.86*10 <sup>5</sup> |  |   |     |  |
|          |                      |     | 5.57*10 <sup>6</sup> |  |   |     |  |
| 08/15-16 | 1.14*10 <sup>5</sup> | 5/5 |                      |  | 0 | 0/1 |  |
|          | 2.96*10 <sup>3</sup> |     |                      |  |   |     |  |
|          | 1.00*10 <sup>4</sup> |     |                      |  |   |     |  |
|          | 1.58                 |     |                      |  |   |     |  |
|          | 9.65*10 <sup>2</sup> |     |                      |  |   |     |  |
| 09/19    | 4.75*10 <sup>4</sup> | 1/5 |                      |  | 0 | 0/5 |  |
|          | 0                    |     |                      |  | 0 |     |  |
|          | 0                    |     |                      |  | 0 |     |  |
|          | 0                    |     |                      |  | 0 |     |  |
|          | 0                    |     |                      |  | 0 |     |  |

GE: genomic equivalent, prevalence = ratio number of Rv positive specimen / total number of specimen tested.
